# Supplementary material for: Alleviate theJ–Vhysteresis of carbon-based perovskite solar cellsviaintroducing additional methylammonium chloride into MAPbI3precursor
Source: Royal Society of Chemistry journal article supplement (doi:10.1039/c8ra04347g), 2018-01-01
Supplement: c8ra04347g1.pdf [file c8ra04347g1.pdf]

## Supporting information

**Table S1.** Photovoltaic parameters of devices based on MAPbI<sub>3</sub>-xMACl.

| Device    | Scan direction | V <sub>oc</sub> (mV) | J <sub>sc</sub> (mAcm <sup>-2</sup> ) | FF   | PCE(%) |
|-----------|----------------|----------------------|---------------------------------------|------|--------|
| 0 MACl    | R-S            | 867                  | 14.92                                 | 0.68 | 8.74   |
|           | F-S            | 830                  | 12.41                                 | 0.47 | 4.80   |
| 0.15 MACl | R-S            | 912                  | 15.87                                 | 0.62 | 8.93   |
|           | F-S            | 901                  | 15.05                                 | 0.48 | 6.47   |
| 0.3 MACl  | R-S            | 945                  | 18.70                                 | 0.65 | 11.50  |
|           | F-S            | 951                  | 18.78                                 | 0.58 | 10.33  |
| 0.45 MACl | R-S            | 1024                 | 20.13                                 | 0.68 | 14.27  |
|           | F-S            | 1033                 | 20.14                                 | 0.70 | 14.50  |
| 0.6 MACl  | R-S            | 953                  | 16.28                                 | 0.61 | 9.39   |
|           | F-S            | 944                  | 16.38                                 | 0.59 | 9.12   |
| 0.75 MACl | R-S            | 956                  | 15.69                                 | 0.62 | 9.26   |
|           | F-S            | 955                  | 15.35                                 | 0.62 | 9.06   |
| 0.9 MACl  | R-S            | 957                  | 15.21                                 | 0.58 | 8.46   |
|           | F-S            | 951                  | 15.12                                 | 0.59 | 8.42   |
| 1.05 MACl | R-S            | 917                  | 7.82                                  | 0.66 | 4.70   |
|           | F-S            | 916                  | 7.84                                  | 0.64 | 4.62   |

**Table S2.** Photovoltaic parameters of devices based on pristine MAPbI<sub>3</sub> (a batch of 15 devices)

| Sample  | V <sub>oc</sub> (mV) | J <sub>sc</sub> (mA/cm <sup>2</sup> ) | FF   | PCE(%) |
|---------|----------------------|---------------------------------------|------|--------|
| 1       | 867                  | 14.92                                 | 0.68 | 8.74   |
| 2       | 895                  | 14.80                                 | 0.62 | 7.13   |
| 3       | 862                  | 15.22                                 | 0.59 | 7.73   |
| 4       | 873                  | 14.95                                 | 0.61 | 7.91   |
| 5       | 917                  | 13.86                                 | 0.55 | 7.06   |
| 6       | 907                  | 11.78                                 | 0.54 | 5.74   |
| 7       | 890                  | 14.59                                 | 0.51 | 6.61   |
| 8       | 867                  | 12.72                                 | 0.70 | 7.67   |
| 9       | 844                  | 11.27                                 | 0.68 | 6.50   |
| 10      | 896                  | 12.09                                 | 0.54 | 5.87   |
| 11      | 892                  | 12.10                                 | 0.69 | 7.43   |
| 12      | 869                  | 13.43                                 | 0.65 | 7.54   |
| 13      | 854                  | 12.36                                 | 0.65 | 6.86   |
| 14      | 871                  | 13.34                                 | 0.51 | 5.85   |
| 15      | 854                  | 13.39                                 | 0.68 | 7.73   |
| Average | 877                  | 13.39                                 | 0.61 | 7.09   |

**Table S3.** Photovoltaic parameters of devices based on pristine MAPbI<sub>3</sub>-0.45MACl (a batch of 15 devices)

| Sample  | V <sub>oc</sub> (mV) | J <sub>sc</sub> (mA/cm <sup>2</sup> ) | FF   | PCE(%) |
|---------|----------------------|---------------------------------------|------|--------|
| 1       | 977                  | 19.90                                 | 0.67 | 13.12  |
| 2       | 987                  | 17.16                                 | 0.71 | 12.08  |
| 3       | 996                  | 17.91                                 | 0.72 | 12.93  |
| 4       | 976                  | 18.88                                 | 0.70 | 12.89  |
| 5       | 972                  | 17.76                                 | 0.74 | 12.37  |
| 6       | 969                  | 20.36                                 | 0.65 | 12.77  |
| 7       | 1009                 | 20.17                                 | 0.69 | 13.95  |
| 8       | 978                  | 19.21                                 | 0.70 | 13.16  |
| 9       | 1000                 | 19.42                                 | 0.72 | 14.04  |
| 10      | 993                  | 19.29                                 | 0.72 | 13.86  |
| 11      | 1024                 | 20.13                                 | 0.69 | 14.27  |
| 12      | 1035                 | 19.96                                 | 0.68 | 14.05  |
| 13      | 1023                 | 20.12                                 | 0.69 | 14.18  |
| 14      | 1003                 | 19.32                                 | 0.73 | 14.15  |
| 15      | 983                  | 18.25                                 | 0.70 | 12.55  |
| Average | 995                  | 19.19                                 | 0.70 | 13.36  |

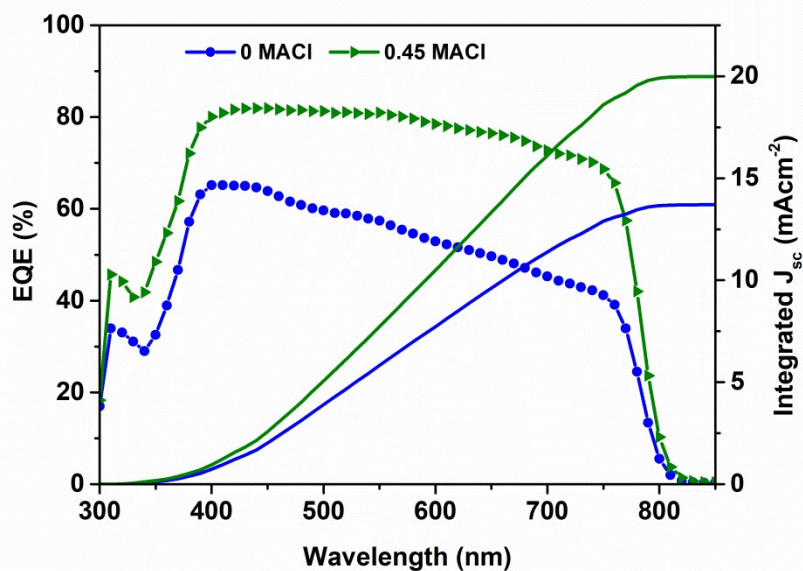

Fig. S1 IPCE spectra and corresponding integrated photocurrents.

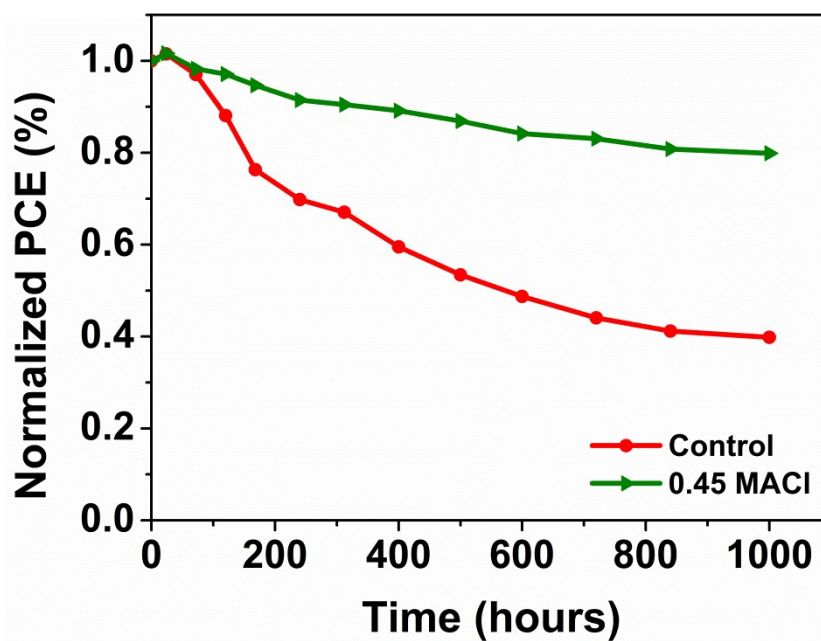

Fig. S2 Long-term stability of the devices with champion recipe (0.45 M MACl).

As shown in Fig. S2, when stored under ambient air condition with  $10 \pm 5$  RH% without encapsulation over 1000 hours, the device based on  $\text{MAPbI}_3 \cdot 0.45\text{MACl}$  is extensively enhanced stability in comparison to the pristine one.
